# Supplementary material for: A graphical model approach for inferring large-scale networks integrating gene expression and genetic polymorphism
Source: PubMed Central journal article supplement (PMC2694152; doi:10.1186/1752-0509-3-55), 2009-05-27
Supplement: 1752-0509-3-55-S1.pdf [file 1752-0509-3-55-S1.pdf]

Table 1: List of 40 genes with 100 or more direct edges in both CAMP and GEO473

| Gene     | CAMP connection frequency | GEO473 connection frequency |
|----------|---------------------------|-----------------------------|
| DPYS     | 104                       | 101                         |
| DRD3     | 282                       | 109                         |
| DSC1     | 251                       | 117                         |
| FBLN2    | 132                       | 194                         |
| HOXD3    | 137                       | 124                         |
| IL12RB2  | 213                       | 108                         |
| PCTK3    | 139                       | 100                         |
| PTPRN2   | 147                       | 117                         |
| SLC13A1  | 205                       | 112                         |
| TNNT1    | 280                       | 127                         |
| ZNF135   | 230                       | 126                         |
| ZNF155   | 130                       | 100                         |
| TCAP     | 142                       | 105                         |
| MYOM2    | 422                       | 123                         |
| FADS2    | 143                       | 100                         |
| CACNG2   | 137                       | 106                         |
| FST      | 331                       | 105                         |
| UTS2     | 380                       | 109                         |
| SOX30    | 128                       | 106                         |
| CAPN11   | 397                       | 114                         |
| ABCB9    | 191                       | 116                         |
| CNTNAP2  | 297                       | 120                         |
| OPLAH    | 129                       | 103                         |
| TRIM17   | 183                       | 120                         |
| QPCTL    | 103                       | 106                         |
| ZSCAN2   | 138                       | 101                         |
| TMEM51   | 109                       | 107                         |
| ZNF532   | 197                       | 124                         |
| DOK4     | 131                       | 105                         |
| LRP2BP   | 187                       | 125                         |
| KIAA1967 | 127                       | 118                         |
| DPEP3    | 165                       | 106                         |
| MMP28    | 113                       | 102                         |
| FSD1     | 233                       | 134                         |
| THAP9    | 128                       | 119                         |
| APOLD1   | 278                       | 110                         |
| MFSD7    | 140                       | 114                         |
| NAV1     | 156                       | 109                         |
| TBC1D16  | 166                       | 166                         |
| PTRF     | 248                       | 103                         |
