# Supplementary material for: A graphical model approach for inferring large-scale networks integrating gene expression and genetic polymorphism
Source: PubMed Central journal article supplement (PMC2694152; doi:10.1186/1752-0509-3-55), 2009-05-27
Supplement: 1752-0509-3-55-S2.pdf [file 1752-0509-3-55-S2.pdf]

Table 2: List of 306 genes with direct edges with IL12RB2 in CAMP

| Gene      | partial correlation | p-value  | adjusted p-value | posterior probability |
|-----------|---------------------|----------|------------------|-----------------------|
| RPH3AL    | 0.040928632         | 2.22E-16 | 2.07E-13         | 1                     |
| QRSL1     | 0.036826263         | 2.22E-16 | 2.07E-13         | 1                     |
| TMPRSS13  | -0.036581806        | 2.22E-16 | 2.07E-13         | 1                     |
| DPYSL4    | -0.036503931        | 2.22E-16 | 2.07E-13         | 1                     |
| IL18RAP   | 0.03562025          | 2.22E-16 | 2.07E-13         | 1                     |
| SLC27A2   | 0.034069289         | 2.22E-16 | 2.07E-13         | 1                     |
| NEFL      | -0.033956011        | 2.22E-16 | 2.07E-13         | 1                     |
| DBH       | -0.032689389        | 2.22E-16 | 2.07E-13         | 1                     |
| CYP4F12   | -0.030199698        | 5.11E-15 | 3.77E-12         | 1                     |
| CXorf6    | 0.030186523         | 5.33E-15 | 3.92E-12         | 1                     |
| ADARB2    | -0.030043102        | 7.11E-15 | 5.12E-12         | 1                     |
| PRSS16    | 0.02916633          | 4.17E-14 | 2.59E-11         | 1                     |
| LOC399900 | -0.029002206        | 5.77E-14 | 3.47E-11         | 1                     |
| CXCR6     | 0.028977725         | 6.06E-14 | 3.63E-11         | 1                     |
| FAM19A1   | -0.027788285        | 6.09E-13 | 2.94E-10         | 1                     |
| FLJ10490  | 0.026855558         | 3.48E-12 | 1.41E-09         | 0.99999999            |
| HOXB4     | 0.02672024          | 4.46E-12 | 1.76E-09         | 0.99999998            |
| DSCAML1   | -0.026623532        | 5.33E-12 | 2.07E-09         | 0.99999998            |
| RNF175    | -0.026584514        | 5.72E-12 | 2.20E-09         | 0.99999998            |
| FLJ39501  | 0.026520243         | 6.43E-12 | 2.45E-09         | 0.99999998            |
| SLC25A29  | -0.02630007         | 9.57E-12 | 3.49E-09         | 0.99999997            |
| WWC1      | -0.026099295        | 1.37E-11 | 4.81E-09         | 0.99999996            |
| ARL17P1   | -0.026028981        | 1.56E-11 | 5.39E-09         | 0.99999995            |
| TMCC1     | -0.025680871        | 2.89E-11 | 9.38E-09         | 0.99999992            |
| IGSF4     | 0.025651902         | 3.04E-11 | 9.81E-09         | 0.99999992            |
| POLR2J2   | -0.025635292        | 3.13E-11 | 1.01E-08         | 0.9999999             |
| PCSK1N    | -0.025591053        | 3.38E-11 | 1.08E-08         | 0.99999989            |
| UTS2      | 0.025502574         | 3.95E-11 | 1.24E-08         | 0.99999988            |
| TMEM46    | 0.025312625         | 5.49E-11 | 1.67E-08         | 0.99999984            |
| IFI27     | 0.025057033         | 8.55E-11 | 2.47E-08         | 0.99999977            |
| ANKDD1A   | 0.024714807         | 1.53E-10 | 4.16E-08         | 0.99999963            |
| GPR44     | 0.024651292         | 1.71E-10 | 4.57E-08         | 0.99999959            |
| ZNF462    | 0.024599166         | 1.87E-10 | 4.95E-08         | 0.99999956            |
| SMC6L1    | 0.024376158         | 2.71E-10 | 6.89E-08         | 0.99999945            |
| SDK2      | 0.024105571         | 4.26E-10 | 1.03E-07         | 0.99999914            |
| COL5A3    | 0.023975305         | 5.29E-10 | 1.24E-07         | 0.9999989             |
| IGFBP3    | 0.023716549         | 8.08E-10 | 1.81E-07         | 0.99999852            |
| IL17RB    | 0.023654901         | 8.94E-10 | 1.97E-07         | 0.99999826            |
| CCRN4L    | -0.023485967        | 1.18E-09 | 2.51E-07         | 0.999998              |
| FLJ32130  | -0.023267078        | 1.67E-09 | 3.42E-07         | 0.99999717            |
| NDUFB1    | -0.023225801        | 1.79E-09 | 3.62E-07         | 0.99999696            |
| DHRS10    | -0.022380114        | 6.75E-09 | 1.16E-06         | 0.99999085            |
| C10orf4   | -0.022287092        | 7.79E-09 | 1.32E-06         | 0.99998989            |
| PNMA5     | 0.022176923         | 9.22E-09 | 1.53E-06         | 0.9999884             |
| 3-Mar     | -0.021871473        | 1.47E-08 | 2.29E-06         | 0.99998332            |
| C1orf61   | 0.02182735          | 1.57E-08 | 2.43E-06         | 0.99998332            |
| PDE4A     | 0.021822484         | 1.58E-08 | 2.44E-06         | 0.99998205            |
| PKN3      | 0.021784305         | 1.67E-08 | 2.56E-06         | 0.99998205            |

Table 2: List of 306 genes with direct edges with IL12RB2 in CAMP

|           |              |          |             |            |
|-----------|--------------|----------|-------------|------------|
| TRIM59    | 0.021401872  | 2.96E-08 | 4.20E-06    | 0.9999684  |
| IGSF2     | 0.021199534  | 3.99E-08 | 5.43E-06    | 0.99995834 |
| RAP1A     | 0.021187483  | 4.06E-08 | 5.52E-06    | 0.99995834 |
| IL9R      | -0.021141088 | 4.35E-08 | 5.85E-06    | 0.99995433 |
| MYOM2     | -0.02104937  | 4.97E-08 | 6.57E-06    | 0.99995433 |
| AKAP11    | 0.021001998  | 5.33E-08 | 6.97E-06    | 0.99994871 |
| C9orf79   | -0.020850509 | 6.64E-08 | 8.42E-06    | 0.99994182 |
| WDR77     | -0.020717877 | 8.03E-08 | 9.91E-06    | 0.9999281  |
| TCEAL2    | 0.020497675  | 1.10E-07 | 1.30E-05    | 0.9999126  |
| PGEA1     | 0.020443386  | 1.19E-07 | 1.38E-05    | 0.99990911 |
| POMZP3    | 0.020418606  | 1.23E-07 | 1.43E-05    | 0.99990242 |
| SIPA1L2   | 0.020372121  | 1.31E-07 | 1.51E-05    | 0.99989447 |
| LILRA1    | -0.020337147 | 1.38E-07 | 1.57E-05    | 0.99989333 |
| NPB       | -0.020314592 | 1.43E-07 | 1.62E-05    | 0.99987727 |
| PTRF      | -0.020242689 | 1.58E-07 | 1.76E-05    | 0.99986603 |
| ZNF532    | 0.020146302  | 1.81E-07 | 1.98E-05    | 0.99985992 |
| CT45-2    | -0.020028573 | 2.13E-07 | 2.28E-05    | 0.99984748 |
| MATN2     | 0.020011935  | 2.18E-07 | 2.33E-05    | 0.99983751 |
| PLEKHK1   | -0.01981951  | 2.84E-07 | 2.92E-05    | 0.99981576 |
| TCF8      | -0.019749556 | 3.13E-07 | 3.16E-05    | 0.99979246 |
| CASP3     | -0.019747829 | 3.14E-07 | 3.17E-05    | 0.99979246 |
| PDE4DIP   | 0.019659933  | 3.54E-07 | 3.51E-05    | 0.99977475 |
| ENTPD1    | 0.019624847  | 3.71E-07 | 3.65E-05    | 0.99976076 |
| FLJ31659  | -0.01954025  | 4.16E-07 | 4.03E-05    | 0.99973347 |
| PDE1B     | 0.019504102  | 4.37E-07 | 4.20E-05    | 0.99973347 |
| UBE2I     | 0.01949964   | 4.40E-07 | 4.22E-05    | 0.99972099 |
| ACTR3B    | -0.019469762 | 4.58E-07 | 4.37E-05    | 0.99971059 |
| CCR3      | 0.019451644  | 4.70E-07 | 4.46E-05    | 0.99971059 |
| AXL       | 0.019342969  | 5.44E-07 | 5.05E-05    | 0.99967275 |
| JAK3      | -0.019339315 | 5.46E-07 | 5.07E-05    | 0.99967275 |
| TREX2     | 0.0192845    | 5.88E-07 | 5.39E-05    | 0.99964918 |
| JUNB      | -0.019231909 | 6.31E-07 | 5.72E-05    | 0.99964918 |
| KIAA1967  | 0.019224767  | 6.37E-07 | 5.77E-05    | 0.99963183 |
| SLC22A4   | -0.01920853  | 6.51E-07 | 5.88E-05    | 0.99963183 |
| ANKRD15   | 0.019182964  | 6.74E-07 | 6.05E-05    | 0.99960683 |
| LOC283755 | 0.019164879  | 6.90E-07 | 6.17E-05    | 0.99960683 |
| SF1       | 0.019130743  | 7.22E-07 | 6.41E-05    | 0.99960683 |
| PTGDS     | -0.019121942 | 7.31E-07 | 6.48E-05    | 0.99960683 |
| PAQR6     | 0.019103776  | 7.49E-07 | 6.61E-05    | 0.9995935  |
| ATHL1     | -0.019099154 | 7.54E-07 | 6.64E-05    | 0.99955769 |
| LOC401233 | -0.019040825 | 8.14E-07 | 7.10E-05    | 0.99953204 |
| FLJ31438  | 0.018920467  | 9.55E-07 | 8.12E-05    | 0.99950131 |
| TMEM107   | -0.018835245 | 1.07E-06 | 8.91E-05    | 0.99947021 |
| ZP3       | 0.018748794  | 1.20E-06 | 9.81E-05    | 0.99936534 |
| DPPA4     | 0.01871909   | 1.24E-06 | 0.000101338 | 0.99936534 |
| ROBO3     | -0.018681785 | 1.31E-06 | 0.000105559 | 0.99934936 |
| MITF      | -0.018665463 | 1.33E-06 | 0.000107453 | 0.99934936 |
| C10orf39  | -0.018664232 | 1.34E-06 | 0.000107597 | 0.99934936 |
| FXYD5     | -0.018613495 | 1.43E-06 | 0.000113654 | 0.99934936 |

Table 2: List of 306 genes with direct edges with IL12RB2 in CAMP

|          |              |          |             |            |
|----------|--------------|----------|-------------|------------|
| TAP2     | 0.018584095  | 1.48E-06 | 0.000117321 | 0.99928273 |
| LGALS12  | -0.018550638 | 1.55E-06 | 0.000121648 | 0.99927301 |
| TTC10    | -0.018444797 | 1.77E-06 | 0.000136244 | 0.99919561 |
| CREB3L3  | -0.018370069 | 1.95E-06 | 0.000147571 | 0.99915226 |
| SULT1A2  | 0.018346599  | 2.01E-06 | 0.000151279 | 0.99909542 |
| C18orf56 | 0.018327815  | 2.06E-06 | 0.000154335 | 0.99909542 |
| ATF7IP   | 0.018324641  | 2.07E-06 | 0.000154855 | 0.99909542 |
| C6orf191 | -0.018275743 | 2.20E-06 | 0.000163121 | 0.99903825 |
| MGP      | 0.018088209  | 2.80E-06 | 0.000198943 | 0.9987881  |
| NT5DC2   | 0.018002584  | 3.12E-06 | 0.000217617 | 0.99873433 |
| RPS6KA2  | -0.017974489 | 3.23E-06 | 0.000224064 | 0.99868028 |
| FXYD2    | 0.017934441  | 3.40E-06 | 0.000233623 | 0.99861197 |
| NPTX1    | -0.017930342 | 3.41E-06 | 0.000234624 | 0.99861197 |
| CCNT2    | -0.017894316 | 3.57E-06 | 0.00024356  | 0.99861197 |
| NRCAM    | 0.017831765  | 3.86E-06 | 0.000259832 | 0.99849577 |
| RFPL2    | -0.017786632 | 4.08E-06 | 0.000272174 | 0.99839812 |
| MMP9     | 0.017751119  | 4.27E-06 | 0.00028232  | 0.99837735 |
| MGC3101  | -0.017718996 | 4.44E-06 | 0.000291746 | 0.99837735 |
| SMG6     | 0.017686161  | 4.63E-06 | 0.000301703 | 0.9982369  |
| HLA-DPB1 | 0.017597105  | 5.17E-06 | 0.000330592 | 0.9980553  |
| COL6A1   | 0.017563429  | 5.39E-06 | 0.000342133 | 0.9980553  |
| OR10G8   | -0.017539068 | 5.55E-06 | 0.000350673 | 0.99800595 |
| TSGA10   | -0.01746957  | 6.04E-06 | 0.000376157 | 0.99786436 |
| MRE11A   | -0.017451026 | 6.18E-06 | 0.000383244 | 0.99786436 |
| PTCH     | -0.017420938 | 6.41E-06 | 0.000395033 | 0.99775385 |
| RAB40C   | 0.01737382   | 6.79E-06 | 0.000414194 | 0.99767046 |
| ANKRD28  | 0.017345971  | 7.03E-06 | 0.000425872 | 0.99759402 |
| THTPA    | 0.01726236   | 7.78E-06 | 0.000463127 | 0.9973953  |
| SLC16A11 | -0.017260425 | 7.80E-06 | 0.000464021 | 0.9973953  |
| DNAI2    | -0.01711599  | 9.28E-06 | 0.000535528 | 0.99706133 |
| DNAJC1   | 0.017093977  | 9.53E-06 | 0.00054721  | 0.99704009 |
| FGF3     | 0.017091103  | 9.56E-06 | 0.000548751 | 0.99704009 |
| LSS      | 0.017088825  | 9.59E-06 | 0.000549974 | 0.99704009 |
| MGC24975 | 0.017045521  | 1.01E-05 | 0.000573852 | 0.99685895 |
| C6orf25  | -0.017010267 | 1.05E-05 | 0.000593899 | 0.99685895 |
| COL25A1  | 0.016965215  | 1.11E-05 | 0.000620549 | 0.99669769 |
| KCNH6    | -0.016937059 | 1.15E-05 | 0.000637765 | 0.99646156 |
| CLEC10A  | -0.016915259 | 1.18E-05 | 0.000651439 | 0.99646156 |
| SH3MD2   | -0.016895338 | 1.21E-05 | 0.000664132 | 0.99635277 |
| GPR113   | -0.016869439 | 1.25E-05 | 0.000681009 | 0.99633468 |
| OGDH     | 0.0167753    | 1.39E-05 | 0.000746186 | 0.99588135 |
| SH3KBP1  | -0.016736937 | 1.46E-05 | 0.000774411 | 0.9956887  |
| DBF4B    | 0.016573491  | 1.76E-05 | 0.000905473 | 0.9951256  |
| ARFIP2   | 0.01653687   | 1.84E-05 | 0.000937465 | 0.99504024 |
| LASS4    | -0.016498271 | 1.93E-05 | 0.0009722   | 0.99495799 |
| ENG      | 0.016436429  | 2.07E-05 | 0.001030181 | 0.99459755 |
| MXD3     | -0.016378101 | 2.21E-05 | 0.001088894 | 0.99392114 |
| KIAA0265 | 0.016360349  | 2.26E-05 | 0.001107325 | 0.99392114 |
| FANK1    | 0.016335971  | 2.32E-05 | 0.001132999 | 0.99392114 |

Table 2: List of 306 genes with direct edges with IL12RB2 in CAMP

|             |              |            |             |            |
|-------------|--------------|------------|-------------|------------|
| RGS1        | 0.016332476  | 2.33E-05   | 0.001136714 | 0.99392114 |
| ZNF658B     | 0.016306987  | 2.40E-05   | 0.001164073 | 0.99366903 |
| CA1         | 0.016292923  | 2.44E-05   | 0.001179523 | 0.99362803 |
| B3Gn-T6     | -0.016226567 | 2.64E-05   | 0.001255189 | 0.99320729 |
| TSPAN33     | -0.016168871 | 2.82E-05   | 0.001324365 | 0.99292564 |
| LOC255374   | -0.016166594 | 2.82E-05   | 0.001327163 | 0.99292564 |
| APPBP1      | -0.016164473 | 2.83E-05   | 0.001329775 | 0.99292564 |
| C22orf8     | -0.016155856 | 2.86E-05   | 0.001340419 | 0.99292564 |
| ACSBG2      | -0.016134242 | 2.93E-05   | 0.001367385 | 0.99292564 |
| C12orf60    | -0.016117188 | 2.99E-05   | 0.001389088 | 0.99254072 |
| OTEX        | -0.016065184 | 3.17E-05   | 0.00145743  | 0.99217326 |
| AFMID       | 0.01600249   | 3.40E-05   | 0.001543951 | 0.99199943 |
| DHFR        | 0.016000327  | 3.41E-05   | 0.001547    | 0.99199943 |
| BCR         | 0.015957296  | 3.58E-05   | 0.001608707 | 0.99189544 |
| PLA2G7      | 0.015951006  | 3.60E-05   | 0.00161787  | 0.99189544 |
| KRTCAP3     | 0.015945812  | 3.63E-05   | 0.001625462 | 0.99189544 |
| HOXA7       | -0.01593291  | 3.68E-05   | 0.00164443  | 0.99189544 |
| INSIG1      | -0.015912715 | 3.76E-05   | 0.001674685 | 0.9911138  |
| PCTP        | 0.015847157  | 4.05E-05   | 0.001777175 | 0.99087014 |
| SLAMF7      | 0.015786085  | 4.34E-05   | 0.001877485 | 0.99032315 |
| ITPKC       | 0.015762757  | 4.45E-05   | 0.001917187 | 0.99032315 |
| P2RX5       | 0.015758148  | 4.47E-05   | 0.001925099 | 0.99032315 |
| C14orf161   | 0.01568675   | 4.84E-05   | 0.002052351 | 0.98899484 |
| NT5E        | -0.015681773 | 4.87E-05   | 0.002061591 | 0.98899484 |
| DEFA4       | -0.015667933 | 4.95E-05   | 0.00208744  | 0.98899484 |
| RFC3        | -0.015572988 | 5.49E-05   | 0.002271866 | 0.98852772 |
| IL27        | 0.015558837  | 5.58E-05   | 0.002300426 | 0.98826293 |
| C18orf24    | 0.015522291  | 5.81E-05   | 0.00237603  | 0.98807711 |
| MGC32020    | 0.015425016  | 6.46E-05   | 0.002589927 | 0.98679433 |
| HLF         | -0.015407555 | 6.59E-05   | 0.002629886 | 0.98679433 |
| GCC2        | 0.015398917  | 6.65E-05   | 0.002649809 | 0.98679433 |
| TAF1A       | 0.015376565  | 6.81E-05   | 0.00270188  | 0.98674977 |
| RBPM52      | 0.015372055  | 6.85E-05   | 0.002712471 | 0.98674977 |
| RBMS2       | 0.015370903  | 6.86E-05   | 0.002715179 | 0.98674977 |
| NRG1        | 0.015330836  | 7.16E-05   | 0.002810561 | 0.98674977 |
| MEIS1       | -0.015249413 | 7.82E-05   | 0.003013417 | 0.98494957 |
| MELK        | 0.015236007  | 7.94E-05   | 0.003048726 | 0.98438932 |
| TNFAIP6     | 0.015233352  | 7.96E-05   | 0.003055777 | 0.98438932 |
| LOC441168   | 0.015182866  | 8.41E-05   | 0.003192157 | 0.98425405 |
| CDKL3       | -0.015153732 | 8.67E-05   | 0.003273067 | 0.98362848 |
| TRIM47      | -0.015145586 | 8.75E-05   | 0.003296077 | 0.98362848 |
| TMPRSS3     | -0.015080861 | 9.38E-05   | 0.003482788 | 0.98362848 |
| GRIPAP1     | 0.015030759  | 9.90E-05   | 0.003633491 | 0.98241755 |
| PAPPA2      | 0.014969247  | 0.00010568 | 0.003826532 | 0.98216388 |
| DKFZp686O24 | 0.014967958  | 0.00010582 | 0.003830655 | 0.98216388 |
| MYO1C       | 0.014913078  | 0.00011217 | 0.004011391 | 0.98111739 |
| JAKMIP2     | -0.014912089 | 0.00011229 | 0.004014708 | 0.98111739 |
| LOC201175   | 0.014897691  | 0.00011402 | 0.004063203 | 0.98106757 |
| FKBPL       | 0.014839087  | 0.00012131 | 0.004265929 | 0.97960458 |

Table 2: List of 306 genes with direct edges with IL12RB2 in CAMP

|           |              |            |             |            |
|-----------|--------------|------------|-------------|------------|
| MDGA1     | -0.014831696 | 0.00012226 | 0.004292312 | 0.97960458 |
| FAM112A   | -0.014826975 | 0.00012287 | 0.004309224 | 0.97960458 |
| SHD       | -0.014821626 | 0.00012357 | 0.004328435 | 0.97960458 |
| THAP8     | -0.014819525 | 0.00012384 | 0.004335995 | 0.97960458 |
| BFSP2     | 0.014815747  | 0.00012434 | 0.004349615 | 0.97960458 |
| LOC91431  | -0.014764018 | 0.0001313  | 0.004539003 | 0.97930998 |
| TTK       | 0.014749532  | 0.00013331 | 0.004593212 | 0.97914006 |
| LOC196463 | -0.014723312 | 0.00013703 | 0.004693141 | 0.97818009 |
| FLCN      | 0.014701492  | 0.0001402  | 0.00477829  | 0.97665773 |
| PPAP2C    | -0.014661291 | 0.00014622 | 0.004940062 | 0.97664075 |
| ZNF80     | 0.014652407  | 0.00014758 | 0.0049763   | 0.97664075 |
| RAB14     | -0.014616584 | 0.0001532  | 0.005124357 | 0.97587957 |
| TNFRSF10D | -0.01455873  | 0.0001627  | 0.005371856 | 0.97484871 |
| FAAH      | 0.014533286  | 0.00016705 | 0.005484199 | 0.97484871 |
| LOC200810 | -0.014524775 | 0.00016853 | 0.005522364 | 0.97346503 |
| TNFSF13B  | 0.014517668  | 0.00016978 | 0.005554622 | 0.97346503 |
| KIF27     | -0.014473838 | 0.00017765 | 0.00575721  | 0.97241494 |
| RPRM      | -0.014453133 | 0.00018149 | 0.005855165 | 0.97241494 |
| AMDHD1    | -0.014425348 | 0.00018676 | 0.005988452 | 0.97228056 |
| FLJ23834  | 0.014398425  | 0.000192   | 0.006120575 | 0.970929   |
| TNFRSF17  | -0.014329949 | 0.00020597 | 0.006466859 | 0.970929   |
| LMNA      | 0.014267828  | 0.00021947 | 0.006795932 | 0.96891429 |
| PPFIBP2   | -0.014265279 | 0.00022004 | 0.006809743 | 0.96891429 |
| KIF1B     | 0.014249079  | 0.0002237  | 0.00689793  | 0.96891429 |
| SIGLEC5   | -0.014227969 | 0.00022856 | 0.007014006 | 0.96877352 |
| DACT1     | -0.014110644 | 0.00025742 | 0.007692275 | 0.96549624 |
| PHF6      | 0.014068558  | 0.00026857 | 0.00795048  | 0.96427136 |
| CCR10     | -0.014032045 | 0.00027862 | 0.008180984 | 0.96177263 |
| DUSP10    | -0.014000425 | 0.0002876  | 0.008387173 | 0.96117821 |
| CAMK2N1   | -0.013994626 | 0.00028928 | 0.00842546  | 0.96117821 |
| IGFL2     | 0.013987154  | 0.00029146 | 0.008474957 | 0.96117821 |
| KISS1R    | -0.013964976 | 0.000298   | 0.00862296  | 0.96117821 |
| FMNL3     | -0.0139572   | 0.00030032 | 0.008675238 | 0.96117821 |
| CPA5      | 0.013951022  | 0.00030219 | 0.008716914 | 0.96117821 |
| TBKBP1    | 0.013935     | 0.00030706 | 0.00882558  | 0.96117821 |
| MMP11     | -0.013879967 | 0.00032437 | 0.009206038 | 0.96083964 |
| SDSL      | 0.01384338   | 0.00033639 | 0.009467502 | 0.95698015 |
| KRTHA7    | -0.013840113 | 0.00033748 | 0.009491466 | 0.95698015 |
| INDOL1    | -0.013839166 | 0.0003378  | 0.009498417 | 0.95698015 |
| PDF       | 0.013836069  | 0.00033884 | 0.009521185 | 0.95698015 |
| DMXL2     | -0.013788324 | 0.00035525 | 0.009876513 | 0.9569218  |
| TXNDC5    | -0.013783739 | 0.00035686 | 0.00991107  | 0.9569218  |
| ME3       | 0.013767298  | 0.00036271 | 0.010035614 | 0.9569218  |
| TMEM110   | -0.01375205  | 0.00036821 | 0.010152076 | 0.95652661 |
| KIAA1446  | 0.013728162  | 0.00037699 | 0.010336521 | 0.95652661 |
| DUSP4     | 0.013724259  | 0.00037844 | 0.010366851 | 0.95652661 |
| VSIG4     | -0.013718458 | 0.00038061 | 0.01041217  | 0.95331437 |
| C20orf22  | -0.013702391 | 0.00038667 | 0.010541053 | 0.95281958 |
| UBE2A     | 0.013689019  | 0.00039179 | 0.010649075 | 0.95281958 |

Table 2: List of 306 genes with direct edges with IL12RB2 in CAMP

|           |              |            |             |            |
|-----------|--------------|------------|-------------|------------|
| CHX10     | -0.013641047 | 0.00041068 | 0.011043513 | 0.95218596 |
| TRIM51    | 0.013606222  | 0.00042492 | 0.011336706 | 0.94981569 |
| MAOB      | 0.013559224  | 0.00044486 | 0.011745107 | 0.94939015 |
| PTPRE     | -0.013550005 | 0.00044888 | 0.011826322 | 0.94939015 |
| UPB1      | -0.013469857 | 0.00048523 | 0.012563735 | 0.94456399 |
| ZNF415    | 0.013436142  | 0.00050132 | 0.012884547 | 0.94367339 |
| SASS6     | -0.013431942 | 0.00050336 | 0.012924934 | 0.94367339 |
| GSTM1     | -0.013424576 | 0.00050696 | 0.012995959 | 0.94367339 |
| PIWIL4    | 0.013423255  | 0.0005076  | 0.013008729 | 0.94367339 |
| MICALCL   | -0.01341771  | 0.00051033 | 0.013062378 | 0.94367339 |
| C8orf58   | -0.013388288 | 0.00052502 | 0.013349336 | 0.94367339 |
| FAM14A    | -0.013380836 | 0.00052881 | 0.013422611 | 0.94367339 |
| PDGFC     | -0.013377047 | 0.00053074 | 0.013459968 | 0.94367339 |
| RFP2      | -0.013361092 | 0.00053895 | 0.013619074 | 0.94126085 |
| CTRC      | -0.013359861 | 0.00053959 | 0.013631463 | 0.94126085 |
| ASB6      | 0.013353645  | 0.00054283 | 0.013694159 | 0.94064305 |
| FLJ45645  | 0.013352051  | 0.00054366 | 0.013710321 | 0.94044209 |
| ANKK1     | 0.013334876  | 0.00055271 | 0.013885293 | 0.94044209 |
| KDELR1    | -0.013257241 | 0.00059538 | 0.014695146 | 0.9390541  |
| ZSCAN2    | -0.013245401 | 0.00060215 | 0.014821639 | 0.9390541  |
| BRRN1     | 0.013239858  | 0.00060535 | 0.014881077 | 0.9390541  |
| DSCAM     | 0.013236441  | 0.00060733 | 0.014917785 | 0.9390541  |
| FAM20C    | 0.013226594  | 0.00061306 | 0.015023859 | 0.9390541  |
| FCRL2     | -0.013220084 | 0.00061688 | 0.01509423  | 0.9390541  |
| CDA       | -0.013200493 | 0.0006285  | 0.015307151 | 0.9390541  |
| C21orf58  | 0.01319007   | 0.00063476 | 0.015421132 | 0.9390541  |
| ARRDC2    | 0.013173811  | 0.00064465 | 0.015600872 | 0.93798965 |
| HP        | -0.013172042 | 0.00064573 | 0.015620503 | 0.93798965 |
| PLEC1     | 0.013151972  | 0.00065816 | 0.015847682 | 0.93169159 |
| C9orf9    | -0.013146564 | 0.00066154 | 0.015910204 | 0.93169159 |
| LOC400707 | 0.013144548  | 0.00066281 | 0.01593356  | 0.93169159 |
| NALP7     | -0.013142408 | 0.00066416 | 0.01595837  | 0.93169159 |
| CD209     | 0.013132191  | 0.00067062 | 0.016077357 | 0.93077517 |
| MSC       | 0.013099755  | 0.00069153 | 0.016459467 | 0.93077517 |
| GNAT2     | 0.01306788   | 0.00071267 | 0.016840322 | 0.92850682 |
| FLJ20130  | 0.013032583  | 0.00073677 | 0.01727313  | 0.92774568 |
| NIPSNAP3A | -0.013025822 | 0.00074148 | 0.017356898 | 0.92774568 |
| C3orf17   | 0.012947761  | 0.00079784 | 0.018342909 | 0.92604417 |
| NDN       | 0.012906616  | 0.00082912 | 0.018886267 | 0.92168872 |
| BCL11A    | -0.012903154 | 0.0008318  | 0.018932603 | 0.92168872 |
| CD151     | 0.012890156  | 0.00084195 | 0.01910721  | 0.92168872 |
| TSPAN32   | -0.012873532 | 0.00085509 | 0.019331869 | 0.92168872 |
| DDX3Y     | -0.012830053 | 0.00089037 | 0.019926993 | 0.92137441 |
| KIAA0125  | 0.012813181  | 0.00090442 | 0.020161083 | 0.91904647 |
| CFH       | 0.012798511  | 0.00091681 | 0.02036853  | 0.91796305 |
| CXCL10    | 0.012787713  | 0.00092602 | 0.020522568 | 0.91705485 |
| GPR34     | 0.012740904  | 0.00096697 | 0.021199946 | 0.91571762 |
| TNFRSF13B | 0.012740248  | 0.00096756 | 0.02120955  | 0.91571762 |
| ARHGEF4   | 0.012694931  | 0.00100882 | 0.02188358  | 0.91306965 |

Table 2: List of 306 genes with direct edges with IL12RB2 in CAMP

|         |              |            |             |            |
|---------|--------------|------------|-------------|------------|
| ANKRD17 | -0.012688222 | 0.00101507 | 0.021984775 | 0.91306965 |
| PRG4    | -0.012659454 | 0.00104225 | 0.022424599 | 0.90736408 |
| DACH1   | 0.012655221  | 0.00104631 | 0.022490691 | 0.90736408 |
| SMCX    | 0.012650091  | 0.00105125 | 0.022570947 | 0.90736408 |
| HDGFRP3 | 0.012643582  | 0.00105754 | 0.022672998 | 0.90736408 |
| KARCA1  | -0.012634741 | 0.00106614 | 0.022812046 | 0.90736408 |
| ALOX5   | -0.012593717 | 0.00110692 | 0.023463596 | 0.90736408 |
| ALG10   | -0.012559962 | 0.00114155 | 0.024008283 | 0.906688   |
| ENTPD6  | -0.01254282  | 0.00115952 | 0.024287812 | 0.906688   |
| SYNC1   | 0.012536871  | 0.00116582 | 0.024385232 | 0.906688   |
| TGIF    | -0.012530921 | 0.00117215 | 0.024484505 | 0.90113368 |
| PCP2    | -0.012497512 | 0.00120828 | 0.025048018 | 0.90113368 |
| SS18    | 0.012494436  | 0.00121166 | 0.025100263 | 0.90113368 |
