# Supplementary material for: A graphical model approach for inferring large-scale networks integrating gene expression and genetic polymorphism
Source: PubMed Central journal article supplement (PMC2694152; doi:10.1186/1752-0509-3-55), 2009-05-27
Supplement: 1752-0509-3-55-S3.pdf [file 1752-0509-3-55-S3.pdf]

Table 3: List of 225 significant gene-SNP associations in CAMP connected to IL12RB2

| Gene     | Marker     | FDR adjusted p-value |
|----------|------------|----------------------|
| QRSL1    | rs2054365  | 1.96E-09             |
| QRSL1    | rs1419055  | 6.30E-10             |
| QRSL1    | rs7750365  | 0.00E+00             |
| QRSL1    | rs3804345  | 0.00E+00             |
| QRSL1    | rs3127657  | 0.00E+00             |
| QRSL1    | rs3101493  | 0.00E+00             |
| QRSL1    | rs3121447  | 1.69E-10             |
| QRSL1    | rs3121445  | 0.00E+00             |
| QRSL1    | rs3104037  | 3.22E-04             |
| DPYSL4   | rs870552   | 2.98E-06             |
| DPYSL4   | rs4880241  | 8.68E-06             |
| DPYSL4   | rs7915260  | 1.69E-05             |
| DPYSL4   | rs4880341  | 8.68E-06             |
| DPYSL4   | rs1873504  | 2.10E-05             |
| DPYSL4   | rs2101613  | 5.90E-06             |
| DPYSL4   | rs923662   | 7.01E-05             |
| DPYSL4   | rs2818405  | 4.96E-02             |
| DPYSL4   | rs2035804  | 3.48E-04             |
| PRSS16   | rs6938200  | 1.15E-02             |
| HOXB4    | rs11079828 | 2.22E-05             |
| HOXB4    | rs9905940  | 1.56E-05             |
| HOXB4    | rs6504340  | 1.56E-05             |
| HOXB4    | rs1042815  | 6.15E-05             |
| HOXB4    | rs2229302  | 5.03E-03             |
| HOXB4    | rs890432   | 1.07E-03             |
| HOXB4    | rs2555111  | 2.26E-02             |
| HOXB4    | rs2288278  | 1.56E-02             |
| HOXB4    | rs9299     | 3.55E-03             |
| RNF175   | rs10517577 | 1.20E-03             |
| RNF175   | rs2606324  | 2.03E-04             |
| RNF175   | rs2251997  | 2.03E-04             |
| RNF175   | rs2251900  | 2.03E-04             |
| RNF175   | rs11099898 | 4.17E-06             |
| RNF175   | rs1598632  | 3.53E-06             |
| RNF175   | rs7653960  | 1.84E-04             |
| SLC25A29 | rs8021068  | 8.56E-06             |
| SLC25A29 | rs1059264  | 0.00E+00             |
| SLC25A29 | rs1059263  | 2.53E-03             |
| SLC25A29 | rs8007427  | 8.12E-12             |
| WWC1     | rs4976597  | 1.06E-04             |
| WWC1     | rs4976598  | 3.73E-05             |
| TMCC1    | rs1136553  | 1.00E-09             |
| TMCC1    | rs2811425  | 1.27E-04             |
| TMCC1    | rs4688772  | 1.54E-08             |
| ANKDD1A  | rs1628955  | 0.00E+00             |
| ANKDD1A  | rs936867   | 9.47E-10             |
| ANKDD1A  | rs1471834  | 1.21E-04             |
| ANKDD1A  | rs2056497  | 1.42E-02             |

Table 3: List of 225 significant gene-SNP associations in CAMP connected to IL12RB2

|           |            |          |
|-----------|------------|----------|
| ANKDD1A   | rs4287512  | 7.01E-05 |
| SMC6L1    | rs4578856  | 3.64E-08 |
| SMC6L1    | rs7556886  | 3.39E-07 |
| COL5A3    | rs2303099  | 1.26E-03 |
| IGFBP3    | rs2471552  | 2.08E-03 |
| IGFBP3    | rs2965073  | 3.62E-03 |
| IGFBP3    | rs1534151  | 6.07E-03 |
| IGFBP3    | rs1534150  | 4.76E-03 |
| NDUFB1    | rs3814833  | 0.00E+00 |
| NDUFB1    | rs12586783 | 2.31E-05 |
| NDUFB1    | rs4548800  | 7.09E-03 |
| NDUFB1    | rs2025072  | 6.71E-03 |
| DHRS10    | rs8110220  | 5.59E-07 |
| DHRS10    | rs16982311 | 1.19E-03 |
| RAP1A     | rs10489469 | 9.38E-03 |
| RAP1A     | rs3767595  | 8.89E-03 |
| MYOM2     | rs1866717  | 4.36E-04 |
| MYOM2     | rs6983960  | 1.67E-04 |
| MYOM2     | rs7002629  | 4.78E-02 |
| MYOM2     | rs2280899  | 5.09E-03 |
| MYOM2     | rs2280904  | 7.69E-04 |
| WDR77     | rs1264874  | 2.66E-02 |
| WDR77     | rs2485319  | 4.76E-02 |
| WDR77     | rs12040764 | 3.28E-02 |
| POMZP3    | rs17718122 | 0.00E+00 |
| POMZP3    | rs1754183  | 6.50E-13 |
| CASP3     | rs1405940  | 4.64E-02 |
| CASP3     | rs2696051  | 7.65E-03 |
| ATHL1     | rs2242565  | 1.22E-06 |
| LOC401233 | rs927340   | 1.14E-06 |
| LOC401233 | rs911536   | 2.10E-06 |
| LOC401233 | rs1885300  | 1.38E-06 |
| LOC401233 | rs7762140  | 2.52E-11 |
| LOC401233 | rs1040521  | 0.00E+00 |
| LOC401233 | rs7774283  | 0.00E+00 |
| LOC401233 | rs7761969  | 0.00E+00 |
| LOC401233 | rs7765538  | 1.74E-05 |
| LOC401233 | rs7775816  | 2.38E-03 |
| LOC401233 | rs12200314 | 0.00E+00 |
| FLJ31438  | rs7349405  | 1.27E-07 |
| FLJ31438  | rs4435493  | 2.71E-07 |
| ZP3       | rs2286427  | 2.66E-02 |
| ZP3       | rs2286428  | 1.05E-03 |
| ROBO3     | rs11219821 | 3.53E-08 |
| ROBO3     | rs4606490  | 7.24E-04 |
| ROBO3     | rs4586175  | 7.19E-03 |
| ROBO3     | rs4077566  | 8.42E-08 |
| C6orf191  | rs2326871  | 8.82E-03 |
| C6orf191  | rs9402178  | 2.10E-05 |

Table 3: List of 225 significant gene-SNP associations in CAMP connected to IL12RB2

|          |            |          |
|----------|------------|----------|
| C6orf191 | rs7776426  | 2.61E-05 |
| C6orf191 | rs9492393  | 1.80E-08 |
| C6orf191 | rs9321191  | 2.98E-07 |
| C6orf191 | rs1480513  | 2.10E-05 |
| C6orf191 | rs9402186  | 2.92E-05 |
| C6orf191 | rs9398926  | 8.56E-06 |
| C6orf191 | rs9321194  | 9.30E-08 |
| C6orf191 | rs6939565  | 2.55E-05 |
| C6orf191 | rs10499166 | 8.68E-06 |
| C6orf191 | rs1337778  | 2.53E-03 |
| C6orf191 | rs9375674  | 5.88E-04 |
| MGP      | rs918121   | 1.25E-02 |
| MGP      | rs10772817 | 1.25E-02 |
| MGP      | rs10846082 | 1.25E-02 |
| MGP      | rs10047541 | 2.55E-02 |
| MGP      | rs2193360  | 1.25E-02 |
| MGP      | rs2445370  | 8.84E-03 |
| NT5DC2   | rs1010554  | 3.97E-02 |
| NPTX1    | rs8071962  | 4.29E-02 |
| MGC3101  | rs3803684  | 1.51E-03 |
| MGC3101  | rs7498985  | 1.01E-02 |
| SLC16A11 | rs189772   | 3.43E-02 |
| APPBP1   | rs363175   | 3.12E-04 |
| APPBP1   | rs422945   | 3.12E-04 |
| C22orf8  | rs104664   | 0.00E+00 |
| C22orf8  | rs742013   | 5.88E-03 |
| C22orf8  | rs6007594  | 5.88E-03 |
| C22orf8  | rs136564   | 0.00E+00 |
| BCR      | rs5751611  | 4.80E-02 |
| BCR      | rs2156921  | 1.25E-02 |
| BCR      | rs131678   | 1.36E-02 |
| BCR      | rs2239666  | 3.50E-02 |
| KRTCAP3  | rs704791   | 7.22E-08 |
| KRTCAP3  | rs1260342  | 7.22E-08 |
| KRTCAP3  | rs4803     | 7.22E-08 |
| KRTCAP3  | rs780104   | 1.85E-07 |
| KRTCAP3  | rs780106   | 1.85E-07 |
| KRTCAP3  | rs1647276  | 7.22E-08 |
| KRTCAP3  | rs1647266  | 9.70E-08 |
| KRTCAP3  | rs1260345  | 4.06E-06 |
| KRTCAP3  | rs2272417  | 6.01E-06 |
| INSIG1   | rs13223383 | 4.31E-03 |
| MDGA1    | rs12191311 | 3.73E-05 |
| MDGA1    | rs10947686 | 1.85E-06 |
| MDGA1    | rs4714089  | 3.27E-09 |
| MDGA1    | rs7745284  | 6.16E-03 |
| MDGA1    | rs9462343  | 2.14E-04 |
| MDGA1    | rs3846876  | 1.96E-09 |
| MDGA1    | rs4711509  | 8.68E-10 |

Table 3: List of 225 significant gene-SNP associations in CAMP connected to IL12RB2

|         |            |          |
|---------|------------|----------|
| MDGA1   | rs10947690 | 6.48E-03 |
| MDGA1   | rs6925749  | 3.89E-09 |
| MDGA1   | rs6903441  | 4.72E-04 |
| MDGA1   | rs4714092  | 2.22E-06 |
| MDGA1   | rs10947692 | 3.83E-03 |
| MDGA1   | rs989713   | 8.43E-06 |
| MDGA1   | rs11752386 | 1.29E-02 |
| MDGA1   | rs6916856  | 1.21E-07 |
| MDGA1   | rs6458011  | 5.08E-10 |
| MDGA1   | rs10947693 | 2.29E-03 |
| MDGA1   | rs6938061  | 0.00E+00 |
| ZNF80   | rs3732781  | 4.05E-02 |
| ZNF80   | rs1354350  | 1.33E-03 |
| RAB14   | rs3789311  | 6.06E-07 |
| RPRM    | rs4294952  | 3.03E-02 |
| AMDHD1  | rs10161146 | 7.99E-08 |
| AMDHD1  | rs2060548  | 2.19E-03 |
| AMDHD1  | rs10735337 | 9.45E-03 |
| AMDHD1  | rs4762254  | 2.37E-03 |
| AMDHD1  | rs726869   | 2.06E-03 |
| AMDHD1  | rs10859990 | 6.06E-03 |
| AMDHD1  | rs4762651  | 1.34E-04 |
| AMDHD1  | rs1025607  | 4.39E-04 |
| PPFIBP2 | rs4322372  | 2.79E-10 |
| PPFIBP2 | rs4757999  | 7.81E-10 |
| PPFIBP2 | rs7925442  | 2.10E-05 |
| PPFIBP2 | rs4758001  | 6.30E-11 |
| PPFIBP2 | rs7481343  | 1.37E-05 |
| PPFIBP2 | rs4076808  | 1.19E-02 |
| KISS1R  | rs2965292  | 1.09E-12 |
| CPA5    | rs2171492  | 5.45E-03 |
| CPA5    | rs3800775  | 5.18E-03 |
| CPA5    | rs7793804  | 6.37E-03 |
| CPA5    | rs7798773  | 6.37E-03 |
| CPA5    | rs10234851 | 6.16E-03 |
| CPA5    | rs888397   | 9.89E-11 |
| CPA5    | rs1544705  | 0.00E+00 |
| CPA5    | rs17164851 | 1.15E-12 |
| CPA5    | rs11761888 | 0.00E+00 |
| CPA5    | rs748812   | 6.65E-08 |
| CPA5    | rs11772922 | 0.00E+00 |
| CPA5    | rs17164872 | 6.40E-06 |
| CPA5    | rs968404   | 1.26E-09 |
| CPA5    | rs12706927 | 3.89E-09 |
| CPA5    | rs17330508 | 1.84E-06 |
| TBKBP1  | rs11870935 | 2.64E-02 |
| TBKBP1  | rs6503796  | 6.26E-04 |
| TBKBP1  | rs4794053  | 6.53E-04 |
| TBKBP1  | rs9913503  | 8.21E-04 |

Table 3: List of 225 significant gene-SNP associations in CAMP connected to IL12RB2

|           |            |          |
|-----------|------------|----------|
| MMP11     | rs2070454  | 4.13E-04 |
| ME3       | rs1540082  | 3.25E-02 |
| ME3       | rs10400291 | 4.20E-02 |
| TMEM110   | rs1986656  | 7.86E-03 |
| KIAA1446  | rs7142209  | 2.60E-10 |
| KIAA1446  | rs4074037  | 2.77E-12 |
| KIAA1446  | rs10148448 | 3.92E-04 |
| KIAA1446  | rs7493101  | 1.79E-02 |
| C20orf22  | rs2274890  | 2.20E-09 |
| C20orf22  | rs6083828  | 0.00E+00 |
| UPB1      | rs738813   | 1.40E-11 |
| UPB1      | rs5760452  | 5.47E-12 |
| UPB1      | rs3788372  | 2.42E-04 |
| UPB1      | rs738814   | 4.44E-03 |
| UPB1      | rs6004171  | 7.44E-04 |
| ZNF415    | rs10423215 | 2.23E-04 |
| GSTM1     | rs11101992 | 3.28E-02 |
| LOC400707 | rs8109759  | 5.07E-05 |
| LOC400707 | rs2311223  | 9.66E-06 |
| LOC400707 | rs10416550 | 1.15E-12 |
| LOC400707 | rs8107491  | 5.71E-11 |
| LOC400707 | rs877589   | 5.10E-13 |
| LOC400707 | rs2288913  | 1.88E-05 |
| LOC400707 | rs7254929  | 0.00E+00 |
| LOC400707 | rs8112461  | 7.22E-08 |
| LOC400707 | rs6509283  | 2.01E-05 |
| LOC400707 | rs10408465 | 4.42E-05 |
| LOC400707 | rs3745795  | 6.06E-03 |
| CD151     | rs3059     | 2.03E-02 |
| TSPAN32   | rs16928081 | 1.31E-02 |
