# Supplementary material for: A graphical model approach for inferring large-scale networks integrating gene expression and genetic polymorphism
Source: PubMed Central journal article supplement (PMC2694152; doi:10.1186/1752-0509-3-55), 2009-05-27
Supplement: 1752-0509-3-55-S5.pdf [file 1752-0509-3-55-S5.pdf]

Table 5: List of 133 significant gene-SNP associations in GeneVar connected to IL1B

| Gene    | Marker     | FDR adjusted | FDR adjusted p-value(univariate) |
|---------|------------|--------------|----------------------------------|
| POMZP3  | rs2527936  | 0            | 0.03533231                       |
| POMZP3  | rs1799119  | 1.24E-06     | 0.01296288                       |
| RARRES2 | rs2531003  | 0.01867692   | 0.10469867                       |
| RARRES2 | rs7781827  | 0.01867692   | 0.10469867                       |
| RARRES2 | rs17837498 | 0.01867692   | 0.10469867                       |
| RARRES2 | rs7806429  | 0.01867692   | 0.10469867                       |
| RARRES2 | rs7788316  | 0.01867692   | 0.10469867                       |
| RARRES2 | rs2159236  | 0.03923293   | 0.02721225                       |
| RARRES2 | rs2108854  | 0.01887046   | 0.04426168                       |
| RARRES2 | rs11767726 | 0.01887046   | 0.04426168                       |
| RARRES2 | rs2108852  | 0.01887046   | 0.04426168                       |
| RARRES2 | rs1983440  | 0.02396519   | 0.04525796                       |
| RARRES2 | rs4554381  | 0.01867692   | 0.03765169                       |
| RARRES2 | rs10247016 | 0.03312511   | 0.33510482                       |
| RARRES2 | rs11769348 | 0.02719584   | 0.07723716                       |
| RARRES2 | rs3735172  | 0.02396519   | 0.04525796                       |
| RARRES2 | rs3735171  | 0.02208012   | 0.05561203                       |
| RARRES2 | rs3735170  | 0.04605039   | 0.03431515                       |
| RARRES2 | rs3735169  | 0.02719584   | 0.08527999                       |
| RARRES2 | rs17173617 | 0.0241618    | 0.02894063                       |
| RARRES2 | rs3735167  | 0.02772438   | 0.04296529                       |
| RARRES2 | rs10282458 | 0.02715603   | 0.01778385                       |
| RARRES2 | rs17173681 | 0.02715282   | 0.02484121                       |
| RARRES2 | rs17173682 | 0.02715282   | 0.02484121                       |
| RARRES2 | rs7800196  | 0.02715282   | 0.02484121                       |
| PEX6    | rs2235831  | 0.01867692   | 0.86165642                       |
| PEX6    | rs6901007  | 2.68E-05     | 0.22778704                       |
| PEX6    | rs2234185  | 3.75E-09     | 0.2606731                        |
| PEX6    | rs4711731  | 4.94E-07     | 0.15855744                       |
| PEX6    | rs4714634  | 2.40E-11     | 0.88546687                       |
| PEX6    | rs3763236  | 0            | 0.77542493                       |
| PEX6    | rs1053538  | 4.23E-13     | 0.75701222                       |
| PEX6    | rs9471969  | 0.0383011    | 0.93767376                       |
| PEX6    | rs9462853  | 0.00366831   | 0.50965271                       |
| PEX6    | rs6927188  | 0.03472666   | 0.8613946                        |
| PEX6    | rs9471970  | 0.03106452   | 0.49768082                       |
| PEX6    | rs7744454  | 0.00895414   | 0.62232614                       |
| PEX6    | rs6941212  | 0            | 0.2676202                        |
| PEX6    | rs9471976  | 0            | 0.51970151                       |
| PEX6    | rs13215983 | 0            | 0.4656736                        |
| PEX6    | rs9462856  | 0            | 0.51970151                       |
| PEX6    | rs11752813 | 0            | 0.25720507                       |
| PEX6    | rs2296805  | 0            | 0.52233684                       |
| PEX6    | rs2296804  | 0            | 0.57009701                       |
| PEX6    | rs1129187  | 0            | 0.25720507                       |
| PEX6    | rs2274517  | 0            | 0.51970151                       |
| PEX6    | rs2274514  | 0            | 0.52252402                       |
| PEX6    | rs3818554  | 0            | 0.58215754                       |

Table 5: List of 133 significant gene-SNP associations in GeneVar connected to IL1B

|          |            |            |            |
|----------|------------|------------|------------|
| PEX6     | rs3805952  | 0          | 0.25720507 |
| PEX6     | rs3805951  | 0          | 0.19666036 |
| PEX6     | rs3293     | 0          | 0.62601901 |
| PEX6     | rs2395943  | 0          | 0.56719273 |
| PEX6     | rs9986447  | 0          | 0.27417893 |
| PEX6     | rs9462857  | 0          | 0.16073955 |
| PEX6     | rs9462859  | 0          | 0.25720507 |
| PEX6     | rs3805946  | 6.54E-14   | 0.32294169 |
| GSTT1    | rs140245   | 0          | 0.25540498 |
| GSTT1    | rs5760147  | 0          | 0.22615997 |
| GSTT1    | rs140289   | 0.00327083 | 0.42423456 |
| GSTT1    | rs6004011  | 0.01698887 | 0.02087259 |
| GSTT1    | rs412377   | 0.00558385 | 0.013559   |
| GSTT1    | rs8141342  | 0.01867692 | 0.01747013 |
| GSTT1    | rs6004014  | 0.01867692 | 0.01747013 |
| GSTT1    | rs5996650  | 0.01867692 | 0.01747013 |
| GSTT1    | rs5996651  | 0.01867692 | 0.01747013 |
| GSTT1    | rs7291786  | 0.01867692 | 0.01747013 |
| GSTT1    | rs140294   | 0.00196643 | 0.51995985 |
| GSTT1    | rs407257   | 0          | 0.22706327 |
| GSTT1    | rs8138555  | 0.01867692 | 0.01747013 |
| GSTT1    | rs5760176  | 0          | 0.24570395 |
| GSTT1    | rs17004811 | 0.00018376 | 0.55161876 |
| GSTT1    | rs738809   | 2.50E-07   | 0.47595873 |
| PPIL3    | rs3851973  | 5.05E-07   | 0.44564209 |
| PPIL3    | rs11892119 | 7.45E-07   | 0.48938063 |
| PPIL3    | rs7562391  | 5.05E-07   | 0.44564209 |
| PPIL3    | rs7606251  | 1.24E-13   | 0.49658077 |
| PPIL3    | rs2136600  | 1.24E-13   | 0.59623244 |
| PPIL3    | rs4035022  | 5.05E-07   | 0.5496953  |
| PPIL3    | rs6747253  | 1.01E-06   | 0.71746524 |
| PPIL3    | rs13384245 | 5.36E-09   | 0.41436921 |
| PPIL3    | rs10204787 | 5.36E-09   | 0.41436921 |
| PPIL3    | rs7588993  | 1.64E-11   | 0.67909524 |
| PPIL3    | rs6435066  | 7.85E-13   | 0.75403914 |
| PPIL3    | rs7917     | 7.85E-13   | 0.75403914 |
| PPIL3    | rs11894842 | 7.85E-13   | 0.75403914 |
| PPIL3    | rs4381763  | 5.36E-09   | 0.29367038 |
| PPIL3    | rs2307358  | 6.92E-09   | 0.46328207 |
| DNASE1L3 | rs7373012  | 0.00951778 | 0.43257197 |
| DNASE1L3 | rs7372278  | 0.01663003 | 0.45754462 |
| DNASE1L3 | rs4074657  | 0.0019174  | 0.44268833 |
| DNASE1L3 | rs7611872  | 0.02851448 | 0.31192302 |
| DNASE1L3 | rs7611951  | 0.02891578 | 0.17756752 |
| DNASE1L3 | rs9855113  | 0.01887046 | 0.36158936 |
| DNASE1L3 | rs4681818  | 0.01887046 | 0.36158936 |
| DNASE1L3 | rs3772985  | 0.00131683 | 0.03752063 |
| DNASE1L3 | rs4234389  | 0.00567764 | 0.23974309 |
| DOK4     | rs648742   | 0.00713976 | 0.79702626 |

Table 5: List of 133 significant gene-SNP associations in GeneVar connected to IL1B

|          |            |            |            |
|----------|------------|------------|------------|
| DOK4     | rs667380   | 0.04820041 | 0.46280225 |
| DOK4     | rs604965   | 6.36E-06   | 0.5395869  |
| DOK4     | rs636985   | 0.01675671 | 0.08814646 |
| DOK4     | rs8054916  | 0.00044522 | 0.63433544 |
| SYNGR1   | rs738331   | 0.03701712 | 0.96324225 |
| SYNGR1   | rs5757613  | 0.02619975 | 0.6292205  |
| SYNGR1   | rs137636   | 0.01212933 | 0.93609067 |
| SYNGR1   | rs5757617  | 0.02153096 | 0.84254966 |
| SYNGR1   | rs11704319 | 0.02153096 | 0.84254966 |
| SYNGR1   | rs12627761 | 0.02855795 | 0.74043163 |
| SYNGR1   | rs137685   | 0.00654778 | 0.63605678 |
| SYNGR1   | rs137687   | 0.00654778 | 0.63605678 |
| SYNGR1   | rs909685   | 3.68E-09   | 0.58012191 |
| SYNGR1   | rs2069235  | 3.68E-09   | 0.58012191 |
| SYNGR1   | rs715505   | 0.00024579 | 0.65747243 |
| C21orf56 | rs8126854  | 0.03078858 | 0.75448024 |
| IRF5     | rs4728142  | 1.59E-09   | 0.51216899 |
| IRF5     | rs752637   | 0          | 0.98420853 |
| IRF5     | rs3807306  | 0          | 0.67313353 |
| IRF5     | rs11761199 | 3.62E-12   | 0.38690749 |
| IRF5     | rs7808907  | 0          | 0.83099002 |
| IRF5     | rs1874328  | 0.00073026 | 0.41130397 |
| IRF5     | rs13242262 | 0          | 0.12015494 |
| IRF5     | rs10488630 | 0.01034952 | 0.79236558 |
| IRF5     | rs2280714  | 0          | 0.61970568 |
| IRF5     | rs10236569 | 0          | 0.51567697 |
| IRF5     | rs6966125  | 9.93E-08   | 0.91407344 |
| IRF5     | rs10229001 | 0          | 0.48296567 |
| IRF5     | rs2172876  | 5.03E-07   | 0.07602147 |
| IRF5     | rs4731534  | 0          | 0.54254611 |
| IRF5     | rs4731535  | 1.82E-07   | 0.07956415 |
| IRF5     | rs8043     | 1.82E-07   | 0.07956415 |
| IRF5     | rs1874332  | 1.82E-07   | 0.07956415 |
| IRF5     | rs2272347  | 0          | 0.42213294 |
| IRF5     | rs7789423  | 0          | 0.66942103 |
| IRF5     | rs6948928  | 0          | 0.66942103 |
